# Supplementary material for: Assessing the Effects of Land Use on Surface Water Quality in the Lower uMfolozi Floodplain System, South Africa
Source: MDPI journal article supplement (doi:10.3390/ijerph18020561), 2021-01-11
Supplement: s1 [file s1]

**Table 1.** Average monthly rainfall and maximum temperature for the 2017 and 2018 periods.

| Months | Monthly average rainfall (mm) |       | Monthly maximum temperature (°C) |      |
|--------|-------------------------------|-------|----------------------------------|------|
|        | 2017                          | 2018  | 2017                             | 2018 |
| JAN    | 126.6                         | 29.4  | 30                               | 31   |
| FEB    | 179.2                         | 140.4 | 30.3                             | 29.3 |
| MAR    | 46.6                          | 66.4  | 30.6                             | 30.2 |
| APR    | 18.2                          | 59.6  | 28.8                             | 28.9 |
| MAY    | 314                           | 205.4 | 27.4                             | 26.5 |
| JUN    | 36.2                          | 40    | 25.7                             | 25.4 |
| JUL    | 10.8                          | 3     | 25.4                             | 25   |
| AUG    | 3.8                           | 48.4  | 25.7                             | 25.3 |
| SEP    | 39.4                          | 40.6  | 27.3                             | 27.6 |
| OCT    | 64.4                          | 96    | 27.5                             | 26.7 |
| NOV    | 122                           | 40.2  | 28.1                             | 27.6 |
| DEC    | 87.6                          | 107.4 | 28.6                             | 29.3 |

Source: <https://www.weathersa.co.za/>.

**Table 2.** SAWQ guidelines accepted limits for agricultural use: irrigation [1].

| Parameters             | Accepted Limits Guideline |
|------------------------|---------------------------|
| <b>Ammonium (mg/l)</b> | 5                         |
| Boron (mg/l)           | 0.5                       |
| Chloride (mg/l)        | 100                       |
| Fluoride (mg/l)        | 2                         |
| Nitrate (mg/l)         | 5                         |
| Nitrite (mg/l)         | 5                         |
| pH                     | 8.4                       |
| SAR                    | 2                         |
| Sodium (mg/l)          | 70                        |
| EC (mS/m)              | 40                        |

**Table 3.** Irrigation water classes for electrical conductivity and sodium adsorption ratio [2].

| Constituents | Fitness for Use |         |          |              |
|--------------|-----------------|---------|----------|--------------|
|              | Good            | Fair    | Marginal | Unacceptable |
| EC (mS/m)    | 0–40            | 40–90   | 90–270   | >270         |
| SAR          | 0–1.5           | 1.5–3.0 | 3.0–5.0  | >5.0         |

1. DWAF. South African Water Quality Guidelines. Volume 4: Agricultural Use. Department of Water Affairs and Forestry: 1996.
2. Koegelenberg, F. Irrigation User's Manual-Chapter 5: Water. *Agricultural Research Council, Silver-ton, South Africa* **2004**.
